# Supplementary material
Source: publisher figshare collection journal article supplement (https://sage.figshare.com/ndownloader/files/12544457)
Supplement: Supplementary file 1 [file 12544457]

*Batt, Feugier, Camou, Coffy, Senneville, Caillon, Calvet, Chidiac, Laurent, Revest, Daures.*  
*Outcomes of in situ reconstruction for aortic graft infection.*

## **Appendix A: Study Protocol**

### **Inclusion criteria:**

- a) clinical studies with a study design that included retrospective patient chart reviews, single-arm non-randomized clinical trials, clinical registries, prospective multi-center data surveys, and prospective non-randomized studies.
- b) clinical studies involving patients treated for prosthetic aortic graft infection with or without PDF.
- c) clinical studies involving the use of extra-anatomic by-pass, Rifampicin-bonded or Silver-coated prostheses, cryopreserved allografts, or autogenous veins.
- d) articles that are full-length and in English

### **Exclusion criteria:**

- a) case studies.
- b) clinical studies involving patients treated for infected aortic aneurysms\* or involving patients with thoracic aortic graft infection.
- c) studies that exclusively involve patients within a narrow age range (<15 years difference), whether exclusively young or old patients\*\*
- d) clinical studies published in a language other than English
- e) clinical studies that document the exclusive or disproportionate involvement of highly virulent micro-organisms in the aortic graft infection\*\*
- f) clinical studies with poor documentation of patient characteristics and the relevant outcome data g) in-vitro studies
- h) if two studies included the same population, only one study was included based on relevance and study size.

\*studies with exclusively infected aortic aneurysms had different bacteriology and results from those with aortic graft infection.

\*\*studies with exclusively young or exclusively old patients (small age range) or exclusive or disproportionate presence of highly virulent micro-organisms (e.g., *Staphylococcus aureus*, *Enterobacteriaceae*, beta-hemolytic *Streptococcus* and *Pseudomonas aeruginosa*) are likely to bias the pooled event rates for that specific treatment modality.

PDF: protheto duodenal fistula.

## **Appendix B: Inclusion and exclusion criteria used to determine selection of clinical studies from MEDLINE and EMBASE database.**

*Batt, Feugier, Camou, Coffy, Senneville, Caillon, Calvet, Chidiac, Laurent, Revest, Daures.*  
*Outcomes of in situ reconstruction for aortic graft infection.*

|                           |     |                                                                                                                               |         |
|---------------------------|-----|-------------------------------------------------------------------------------------------------------------------------------|---------|
| Source of the information | 1.  | Was the paper published in a peer-reviewed journal or, if not, was the study reviewed by some other group?                    | Score/4 |
|                           | 2.  | Is the purpose of the study presented in the publication applicable to the metaanalysis to be performed?                      |         |
|                           | 3.  | If unpublished information from the investigator is required, are there problems recalling data or missing information?       |         |
|                           | 4.  | Are the data provided complete enough for inclusion in this meta-analysis?                                                    |         |
| Study design              | 5.  | Is the design described?                                                                                                      | Score/5 |
|                           | 6.  | Is the design appropriate to the study questions?                                                                             |         |
|                           | 7.  | Are there clear inclusion and exclusion criteria?                                                                             |         |
|                           | 8.  | Are the procedures for randomization (if applicable) and blinding described?                                                  |         |
|                           | 9.  | Are experimental methods clearly defined?                                                                                     |         |
| Study out comes           | 10. | Are the outcomes clearly defined?                                                                                             | Score/3 |
|                           | 11. | Are the methods of measurement clearly defined?                                                                               |         |
|                           | 12. | Do the outcome measures answer the study questions?                                                                           |         |
| Study subjects            | 13. | Did subjects meet the inclusion and exclusion criteria?                                                                       | Score/3 |
|                           | 14. | Are the methods of diagnosis defined and reliable?                                                                            |         |
|                           | 15. | Are demographics included for all subject groups?                                                                             |         |
| Checks                    | 16. | If there are parallel checks, are they comparable to the subjects?                                                            | Score/2 |
|                           | 17. | If historical checks are used, is the data of good quality and from a known source?                                           |         |
| Study Implementation      | 18. | Were inclusion and exclusion criteria strictly adhered to?                                                                    | Score/4 |
|                           | 19. | Are non-compliant or drop-out subjects accounted for?                                                                         |         |
|                           | 20. | In a multi-group study, were the groups comparable at the baseline for prognostic factors?                                    |         |
|                           | 21. | Have treatment methods, population demographics and/or reporting methods changed significantly since the study was performed? |         |
| Treatment protocol        | 22. | Were treatment regimens followed?                                                                                             | Score/3 |
|                           | 23. | Were there any concomitant treatments?                                                                                        |         |
|                           | 24. | Was there a high rate of drop-outs or non-compliant subjects?                                                                 |         |
| Methods                   | 25. | Are the laboratory/surgical methods used in the study known to be accurate and still considered valid today?                  | Score/2 |
|                           | 26. | Are the surgical procedures that were used in the study still applicable?                                                     |         |

|            |     |                                                                                                       |          |
|------------|-----|-------------------------------------------------------------------------------------------------------|----------|
| Statistics | 27. | Are the analytical methods clearly described and appropriate for the data and study design?           | Score/2  |
|            | 28. | Are the conclusions of the study consistent with the descriptive and inferential statistical results? |          |
| TOTAL      |     |                                                                                                       | Score/28 |

### Appendix C: Standardized scoring system used for the selection of publications

*Batt, Feugier, Camou, Coffy, Senneville, Caillon, Calvet, Chidiac, Laurent, Revest, Daures.*

*Outcomes of in situ reconstruction for aortic graft infection.*

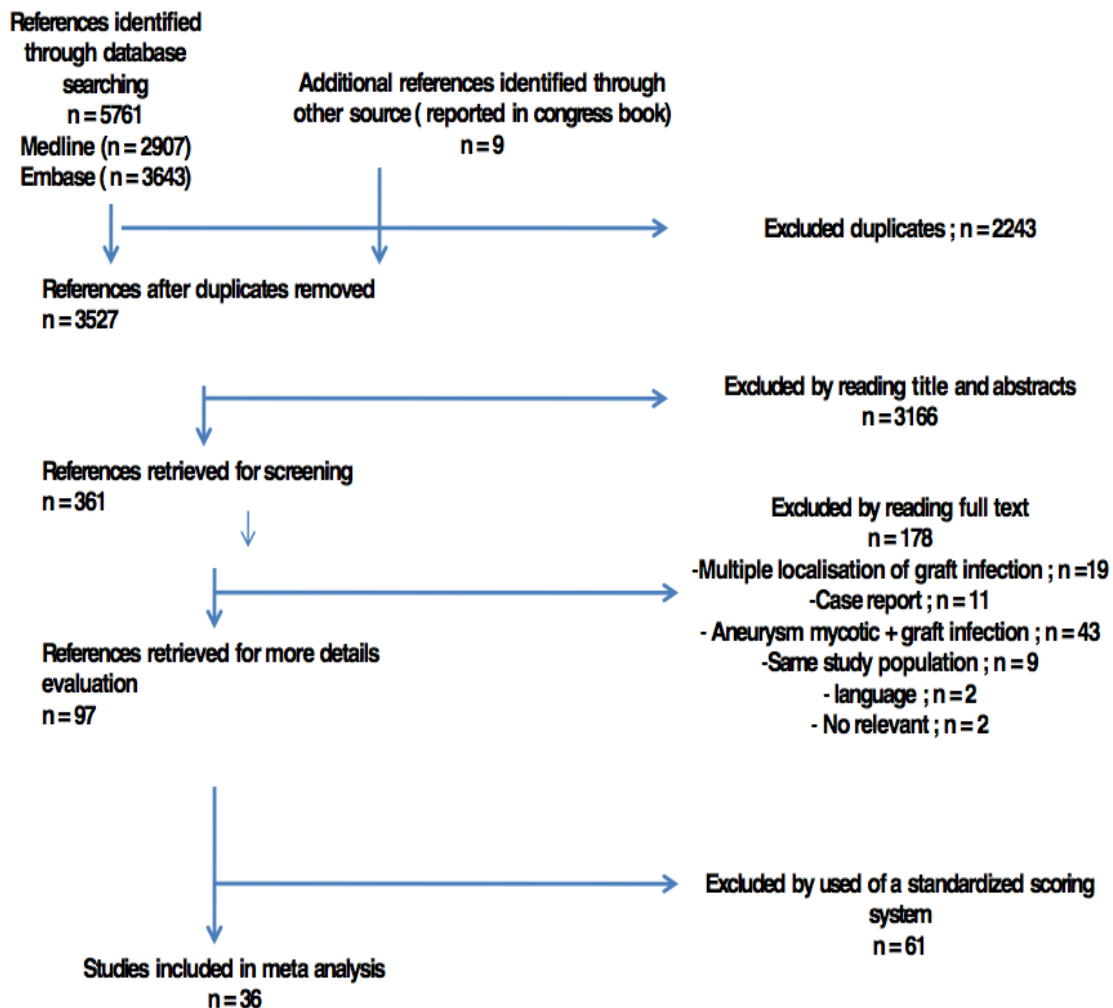

### Appendix D: The flow-diagram

| Year                    |      |         |              |    |     |      |      |      |      |      |      |     |      |      |      |    |
|-------------------------|------|---------|--------------|----|-----|------|------|------|------|------|------|-----|------|------|------|----|
| Sharp <sup>18</sup>     | 1994 | USA     | EAR          | 27 | 33  | 89   | 66   | 62,5 | NA   | 3,7  | 3,7  | 3,7 | 22   | 7,4  | 3,7  | 44 |
| Kuestner <sup>19</sup>  | 1995 | USA     | EAR          | 33 | 100 | 64   | 69,5 | 73,2 | 52,8 | 18,2 | 25,5 | 9,1 | 18,2 | 15,2 | 3,2  | 13 |
| Hannon <sup>20</sup>    | 1996 | UK      | EAR          | 25 | 64  | NA   | 68   | 60   | 24   | 20   | NA   | 16  | NA   | 2,6  | 36   | 32 |
| Bergqvist <sup>21</sup> | 1996 | Sweden  | EAR          | 14 | 100 | 80   | 56,5 | 90   | 35   | 28   | 30   | 3,7 | 14,2 | 29,6 | NA   | NA |
| Mingoli <sup>22</sup>   | 1997 | Italy   | EAR          | 18 | 28  | NA   | NA   | NA   | 30   | 39   | NA   | 9   | NA   | 25   | NA   | NA |
| Menawatt <sup>23</sup>  | 1997 | USA     | EAR          | 40 | 100 | 69.2 | 66   | 79   | 39   | 23   | 60   | 15  | 17,5 | 35   | 12,5 | NA |
| Speziale <sup>24</sup>  | 1997 | Italy   | ISR standard | 18 | 50  | 94   | 64,7 | 46   | 37   | 11   | NA   | 0   | 12,5 | 0    | 22   | 44 |
| Belair <sup>25</sup>    | 1998 | Canada  | EAR          | 8  | 33  | 87   | 68,7 | 43   | 48   | 66   | 87   | 11  | 55   | 50   | 27   | 44 |
|                         |      |         | ISR CryoAll  |    |     |      |      |      |      |      |      |     |      |      |      |    |
| Eugene <sup>26</sup>    | 1998 | France  |              | 22 | 0   | 100  | 63,4 | NA   | 9    | 13,6 | NA   | NA  | 9    | NA   | 45   | 18 |
| Young <sup>13</sup>     | 1999 | USA     | ISR standard | 16 | 60  | NA   | 68   | NA   | 36   | 8    | NA   | 0   | 6    | 25   | 12   | 33 |
| Hayes <sup>27</sup>     | 1999 | UK      | ISR Rifam.   | 11 | 36  | 73   | 66   | 32   | 12   | 18,2 | 36,4 | 0   | 18,2 | 0    | 18   | 27 |
| Seeger <sup>28</sup>    | 2000 | USA     | EAR          | 36 | 0   | 71   | 61,8 | 56,5 | NA   | 11,1 | NA   | 11  | 34,4 | 2,8  | NA   | 27 |
|                         |      |         | ISR CryoAll  |    |     |      |      |      |      |      |      |     |      |      |      |    |
| Verhels <sup>10</sup>   | 2000 | Belgium |              | 90 | 41  | 93   | 64   | 34   | 36   | 17,8 | NA   | 1,4 | 8,1  | 4    | NA   | 17 |
| Bandyk <sup>29</sup>    | 2001 | USA     | ISR Rifamp   | 19 | 0   | 81   | 68   | 48   | 17   | 9,1  | NA   | 0   | 0    | 8    | 19   | 59 |

Batt, Feugier, Camou, Coffy, Senneville, Caillon, Calvet, Chidiac, Laurent, Revest, Daures.  
 Outcomes of in situ reconstruction for aortic graft infection.

2

| ISR CryoAll          |           |                  |           |             |           |             |                 |                  |                |                   |    |     |    |      |    |    |
|----------------------|-----------|------------------|-----------|-------------|-----------|-------------|-----------------|------------------|----------------|-------------------|----|-----|----|------|----|----|
| Chiesa <sup>30</sup> | 2002      | Italy            |           | 68          | 32        | 89          | 65              | 36               | 30             | 16                | 25 | 4,4 | 16 | 13,6 | 50 | NA |
| 1rst Author          | publ.of   | of originCountry | Treatment | N (PD       | %F )      | (%H )       | (Mean yearAge ) | Meaninterval(Mo) | Follow-up (Mo) | mortalityEarly(%) |    |     |    |      |    |    |
|                      | mortality | Late (%)         | Amput(%)  | . occlusion | Graft (%) | ReInfect(%) | organisms       | Virulent *       | Non organi     | Virusm            |    |     |    |      |    |    |

| Batt, Feugier, Camou, Coffy, Senneville, Caillon, Calvet, Chidiac, Laurent, Revest, Daures.<br>Outcomes of in situ reconstruction for aortic graft infection. |      |         |            |     |     |     |      |      |      |      |      |      |      |      |    |    |
|---------------------------------------------------------------------------------------------------------------------------------------------------------------|------|---------|------------|-----|-----|-----|------|------|------|------|------|------|------|------|----|----|
|                                                                                                                                                               |      |         |            |     |     |     |      |      |      | 3    |      |      |      |      |    |    |
| Cardozo <sup>31</sup>                                                                                                                                         | 2002 | Brazil  | ISR Veins  | 12  | 0   | 92  | 61,2 | 23   | 22   | 15,3 | 15,3 | 16,7 | NA   | 0    | 50 | 50 |
| Dorigo <sup>32</sup>                                                                                                                                          | 2003 | Italy   | EAR        | 30  | 100 | 93  | 70   | 37   | 10   | 26,7 | 40   | 3,3  | 10   | 6,7  | NA | NA |
| Lavigne <sup>33</sup>                                                                                                                                         | 2003 | Belgium | EAR        | 26  | 18  | 90  | 65   | NA   | NA   | 16   | NA   | 21   | NA   | 12.5 | 45 | 23 |
| ISR CryoAll                                                                                                                                                   |      |         |            |     |     |     |      |      |      |      |      |      |      |      |    |    |
| Lavigne <sup>33</sup>                                                                                                                                         | 2003 | Belgium |            | 22  | 18  | 90  | 65   | NA   | 18   | 14   | 16   | 4,5  | 0    | 27   | 45 | 23 |
| Daemens <sup>34</sup>                                                                                                                                         | 2003 | Belgium | ISR Veins  | 49  | 0   | 92  | 65   | 59   | 41   | 8    | NA   | 2    | 4    | 0    | 39 | 55 |
| Batt <sup>35</sup>                                                                                                                                            | 2003 | France  | ISR Silver | 24  | 48  | 93  | 69   | 78   | 17   | 16,6 | 16,6 | 0    | 0    | 3,7  | 24 | 24 |
| ISR CryoAll                                                                                                                                                   |      |         |            |     |     |     |      |      |      |      |      |      |      |      |    |    |
| Gabriel <sup>36</sup>                                                                                                                                         | 2004 | Poland  |            | 39  | 9   | 85  | 61   | 27   | NA   | 15   | NA   | 8,1  | 7,7  | 10,3 | 34 | 13 |
| ISR CryoAll                                                                                                                                                   |      |         |            |     |     |     |      |      |      |      |      |      |      |      |    |    |
| Kieffer <sup>12</sup>                                                                                                                                         | 2004 | France  |            | 179 | 30  | 89  | 65   | 73,2 | 46   | 20,1 | 28   | 0    | 29,7 | 7    | NA | NA |
| Hart <sup>37</sup>                                                                                                                                            | 2005 | USA     | EAR        | 15  | 40  | 90  | 70   | 67   | 15   | 40   | 45   | 6    | NA   | 13   | NA | NA |
| Armstrong <sup>5</sup>                                                                                                                                        | 2005 | USA     | EAR        | 25  | 100 | 66  | 70   | 47   | NA   | 21   | NA   | 6,9  | NA   | 13,8 | 4  | 25 |
| Baril <sup>38</sup>                                                                                                                                           | 2006 | USA     | EAR        | 7   | 100 | 71  | 66,3 | 38,4 | 23   | 28,6 | NA   | NA   | NA   | 0    | 22 | 11 |
| Oderich <sup>6</sup>                                                                                                                                          | 2006 | USA     | EAR        | 43  | 56  | 74  | 66,3 | NA   | 41   | 11,6 | NA   | 9    | 37,2 | 11,6 | 14 | 33 |
|                                                                                                                                                               |      |         |            |     |     |     |      |      |      |      |      |      |      |      |    |    |
| Mirzaie <sup>39</sup>                                                                                                                                         | 2007 | Germany | ISR Rifamp | 52  | 56  | 77  | 69,4 | 63,6 | 41   | 8    | 16   | 0    | 8,8  | 11,5 | 14 | 33 |
|                                                                                                                                                               |      |         | ISR Silver | 11  | 0   | 73  | 70   | 42   | 30   | 0    | 0    | 0    | 0    | 0    | 35 | 27 |
| Batt <sup>40</sup>                                                                                                                                            | 2008 | France  | ISR Silver | 24  | 28  | 92  | 67   | 73   | 32,5 | 20,8 | 25   | 4    | 8,3  | 12,5 | 25 | 58 |
| Aavik <sup>41</sup>                                                                                                                                           | 2008 | Estonia | ISR Veins  | 11  | 0   | 100 | 63,5 | 43   | 59   | 0    | 0    | 18,2 | 9,1  | 0    | 9  | 46 |
| Ali <sup>11</sup>                                                                                                                                             | 2009 | USA     | ISR Veins  | 165 | 14  | 64  | 63   | NA   | 32   | 10   | 33   | 7,4  | 0    | 5    | 27 | 33 |
| Pupka <sup>14</sup>                                                                                                                                           | 2011 | Poland  | ISR Silver | 27  | 33  | 100 | 58,4 | NA   | 22,8 | 11   | NA   | 4    | 0    | 4    | 23 | 37 |
| Batt <sup>4</sup>                                                                                                                                             | 2012 | France  | ISR Veins  | 6   | NA  | 96  | 69,7 | 91   | 41   | NA   | NA   | 0    | 0    | 16   | 18 | 9  |

*Batt, Feugier, Camou, Coffy, Senneville, Caillon, Calvet, Chidiac, Laurent, Revest, Daures.*  
*Outcomes of in situ reconstruction for aortic graft infection.*

|                               |      |        |              |     |      |     |      |    |    |      |      |     |      |      |    |    |
|-------------------------------|------|--------|--------------|-----|------|-----|------|----|----|------|------|-----|------|------|----|----|
|                               |      |        | ISR Rifamp   | 8   | 38   | 96  | 69,7 | 91 | 41 | 31,8 | 40   | NA  | 0    | 0    | 18 | 9  |
|                               |      |        | ISR Cryo-All | 21  | 45,4 | 100 | 69,7 | 91 | 41 | 45,5 | 72,7 | 0   | 18,2 | 27,3 | 18 | 9  |
| Lyons <sup>7</sup>            | 2013 | UK     | EAR          | 10  | 15   | 100 | 71   | NA | 29 | 30   | 50   | 10  | 10   | NA   | 10 | 5  |
|                               |      |        | ISR CryoAll  |     |      |     |      |    |    |      |      |     |      |      |    |    |
| Harlander-Locke <sup>42</sup> | 2014 | USA    |              | 220 | 15   | 62  | 65   | NA | 30 | 9    | 30   | 1,8 | 4    | 4    | 21 | 38 |
|                               |      |        | ISR CryoAll  |     |      |     |      |    |    |      |      |     |      |      |    |    |
| Garot <sup>43</sup>           | 2014 | France |              | 22  | 18   | 100 | 67   | NA | 12 | 48   | 48   | NA  | 23   | 0    | 22 | 31 |
| Charlton - Ouw <sup>44</sup>  | 2014 | USA    | EAR          | 5   | 100  | 68  | 69   | 42 | 72 | 20   | 40   | 0   | NA   | 20   | 36 | 36 |
|                               |      |        | ISR Veins    | 11  | 43   | 68  | 69   | 42 | 72 | 0    | 9    | 27  | NA   | 14   | 16 | 13 |
|                               |      |        | ISR standard | 11  | NA   | 68  | 69   | 42 | 72 | 9    | 18   | 18  | NA   | 27   | 36 | 36 |

### Appendix E: Study details

N=number of patients with aortic graft infection; PDF= prosthetic-duodenal fistula; EAR: extra-anatomic reconstruction; ISR standard: in situ reconstruction with standard polyester/PTFE; ISR cryo-all: in situ reconstruction with cryopreserved allografts; ISR veins: in situ reconstruction with autogenous veins; ISR Rifamp: in situ reconstruction with Rifampicin-bonded prostheses; ISR Silver: in situ reconstruction with Silver-coated prostheses. Amput: amputation; RI: reinfection; Mean internal: between the initial intervention and EAR or ISR; NA: not available. \*virulent organisms, i.e., aureus Staphylococcus, Enterobacteriaceae, beta-hemolytic Streptococcus, Pseudomonas.

\*\*non- virulent organisms, i.e., commensal organisms or negative bacteriological cultures.



| VARIABLES              |           |           |                       |                           |
|------------------------|-----------|-----------|-----------------------|---------------------------|
|                        | Age       | PDF       | Virulent<br>Organisms | Non Virulent<br>Organisms |
| Operative<br>Mortality | Silver    | Standard  |                       |                           |
|                        |           | Silver    | Standard              | Cryo-all.                 |
|                        |           | Rifamp.   | Rifamp.               |                           |
|                        |           | Cryo-all. | Cryo-all.             |                           |
|                        |           | Veins     | Veins                 |                           |
| EVENTS                 |           |           |                       |                           |
| Reinfection            | Standard  | Silver    | Veins                 | Veins                     |
|                        | Silver    | Rifamp.   |                       |                           |
|                        | Rifamp.   | Cryo-all. |                       |                           |
|                        | Cryo-all. |           |                       |                           |

#### Appendix F: Selection of conduit with matching events and variables.

Age: Age of the patients; PDF: Prosthetic-duodenal fistula; Standard: Standard polyester/PTFE; Cryo-all: Cryopreserved allograft; Rifamp: Rifampicin-bonded polyester; Veins: autogenous vein; Silver: Silver-coated polyester.

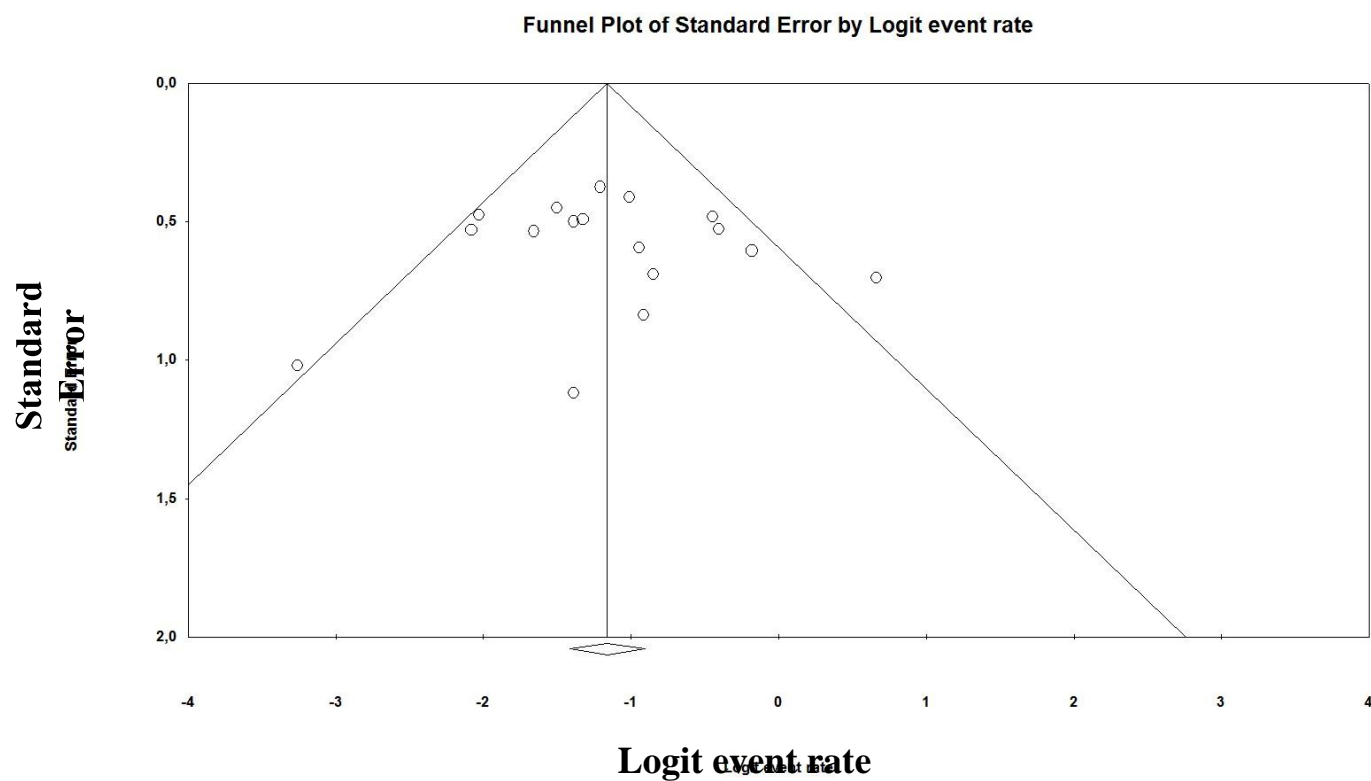

**Appendix G: Funnel plot of the recorded mortality rates for extra-anatomic treatment.** These results are based on the 17 studies included. Egger's test does not show any publication bias ( $p=0.89$ ), which is coherent with the shape of the funnel plot as it shows no asymmetry.

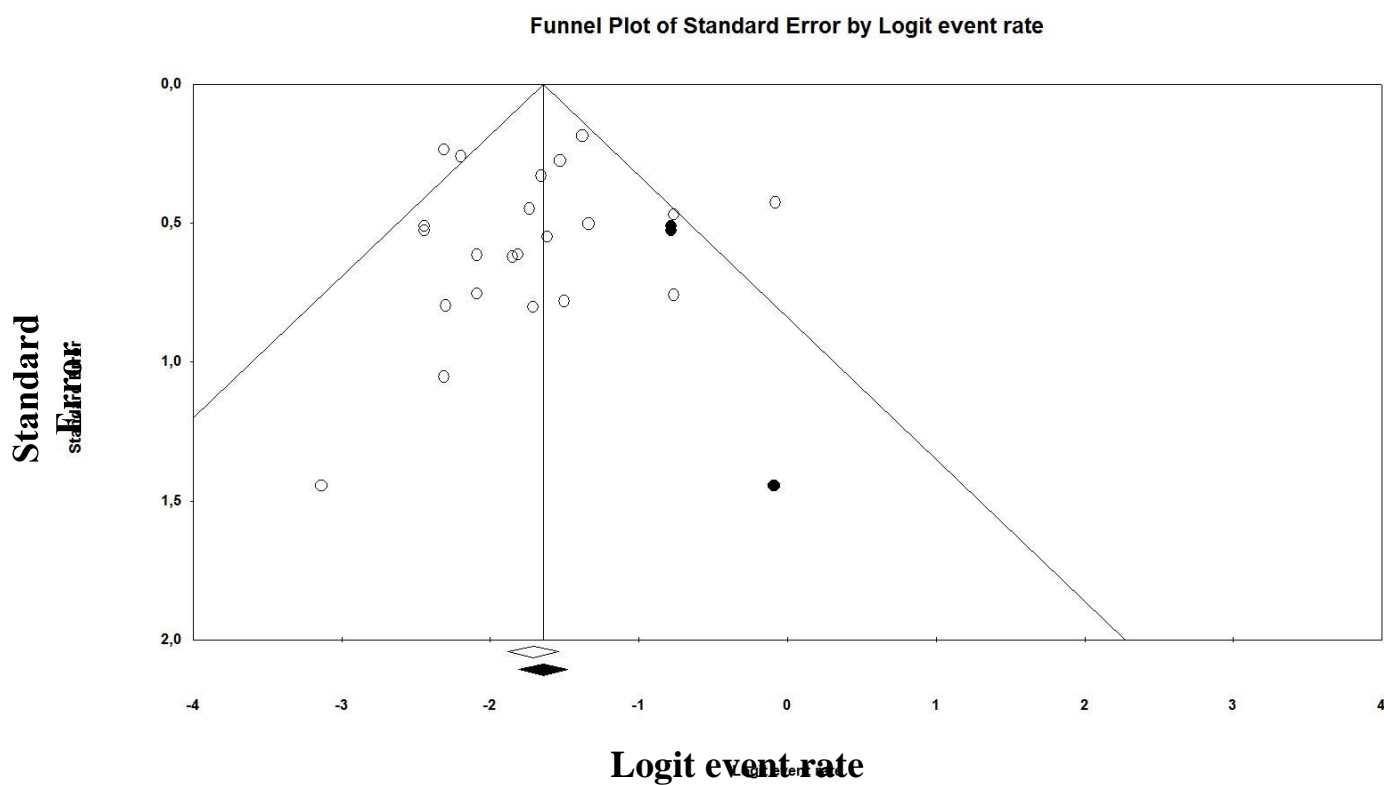

#### Appendix H: Funnel plot of the recorded mortality rates for in situ treatment.

These results are based on the 26 studies included. Egger's test does not show any publication bias ( $p=0.52$ ). There are 5 studies missing, identified by the «Trim and fill» method. The addition of these 5 studies tends to give a higher mortality rate: 16.6%; 95% CI: 13-20%.

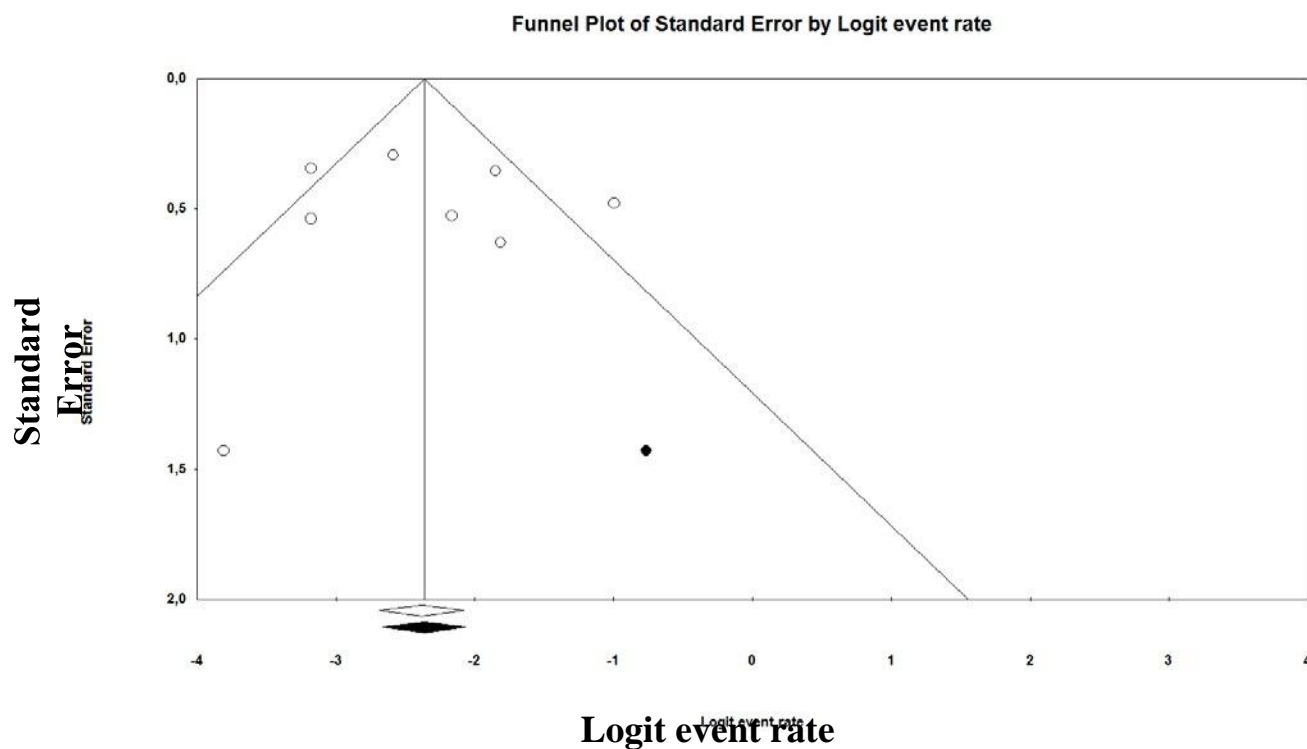

#### **Appendix I: Funnel plot of the recorded infection rates for in situ treatment using cryopreserved allograft.**

These results are based on the 8 studies included and the additional study identified by the «Trim and fill» analysis. Egger's test does not show any publication bias ( $p=0.89$ ). The addition of this study tends to give a higher infection rate: 9.2%; 95% CI: 5.5-15.

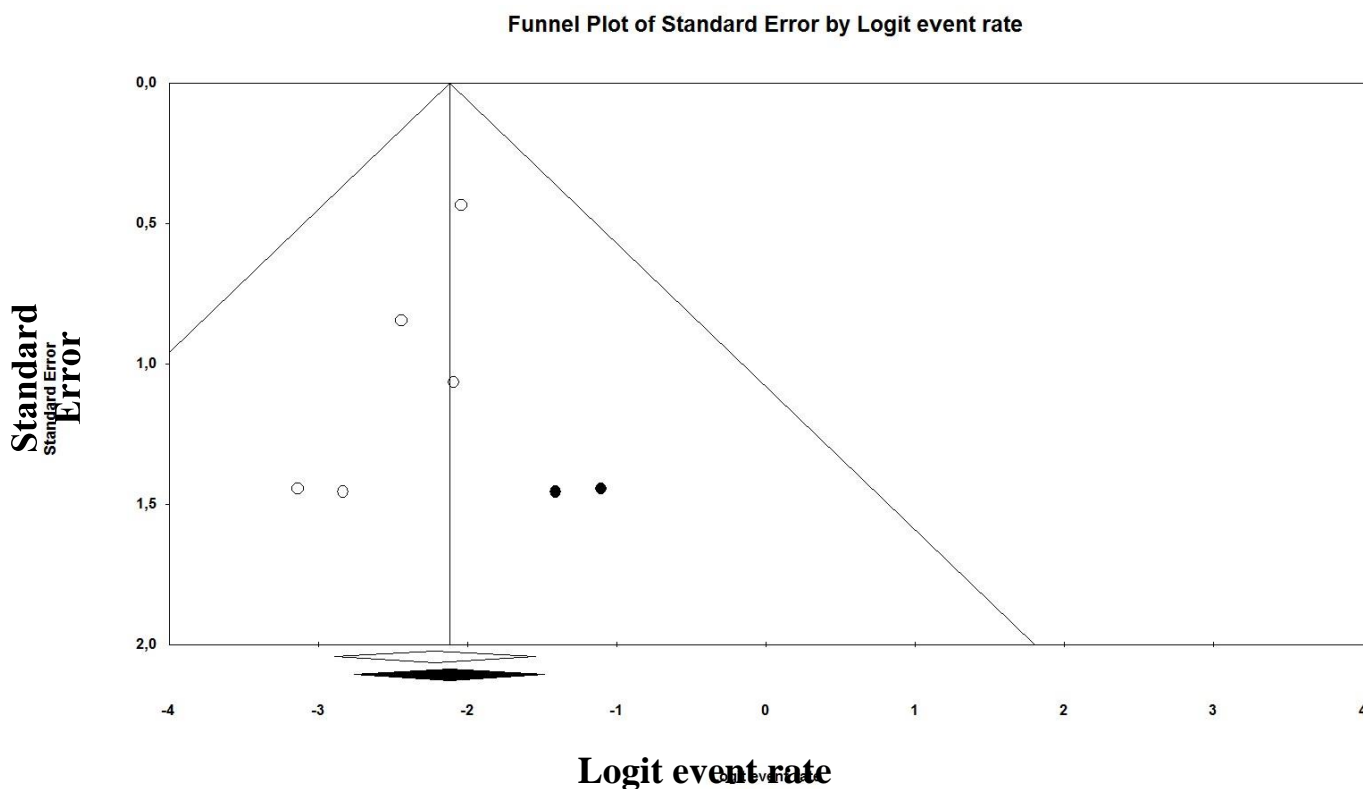

#### Appendix J: Funnel plot of the recorded infection rates for in situ treatment using Rifampicin-bonded polyester.

These results are based on the 5 studies included and the 2 additional studies identified by the «Trim and fill» analysis. Egger's test does not show any publication bias ( $p=0.065$ ). The addition of these 2 studies tends to show a higher infection rate: 10.7%; 95% CI: 6-18.

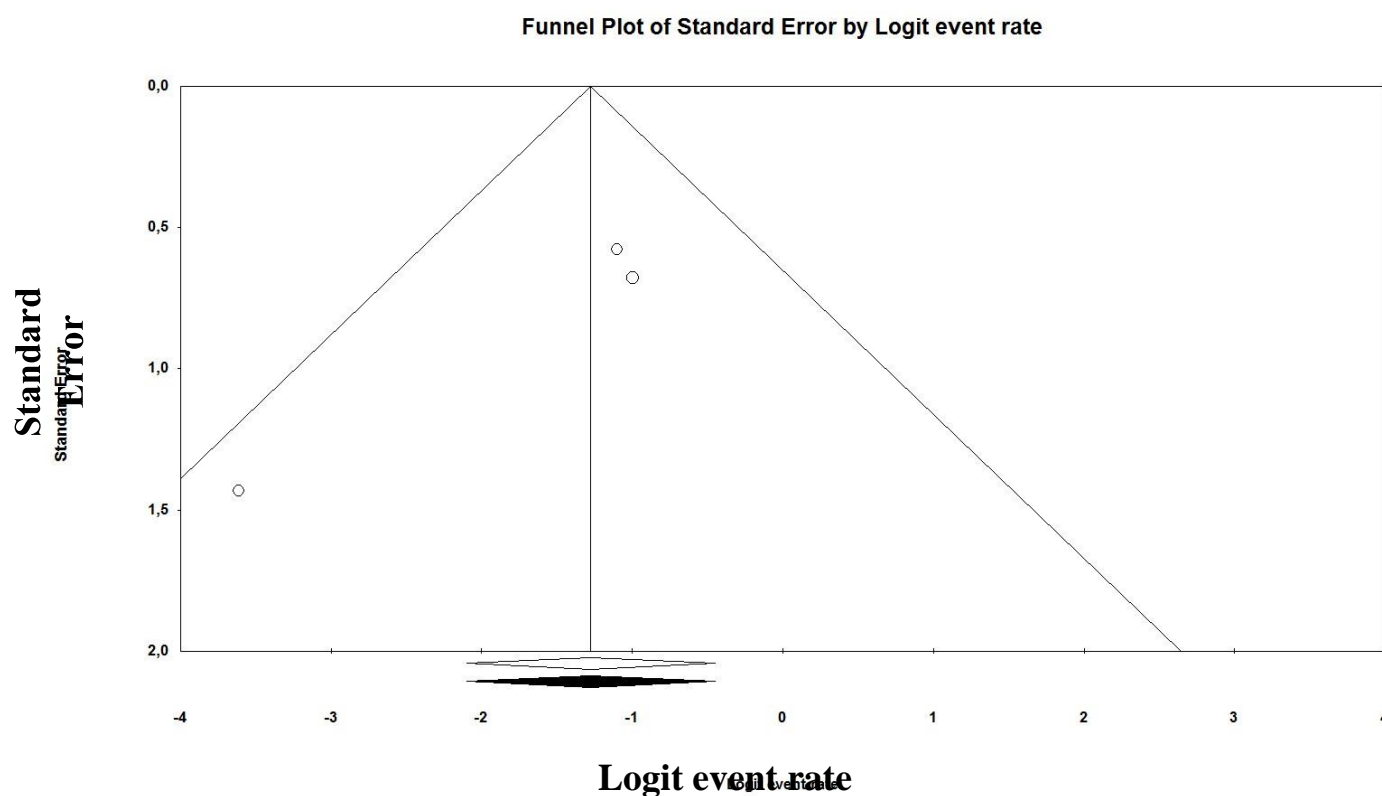

#### **Appendix K: Funnel plot of the recorded infection rates for in situ treatment using standard polyester/PTFE.**

These results are based on the 3 studies included. Egger's test does not show any publication bias ( $p=0.17$ ).

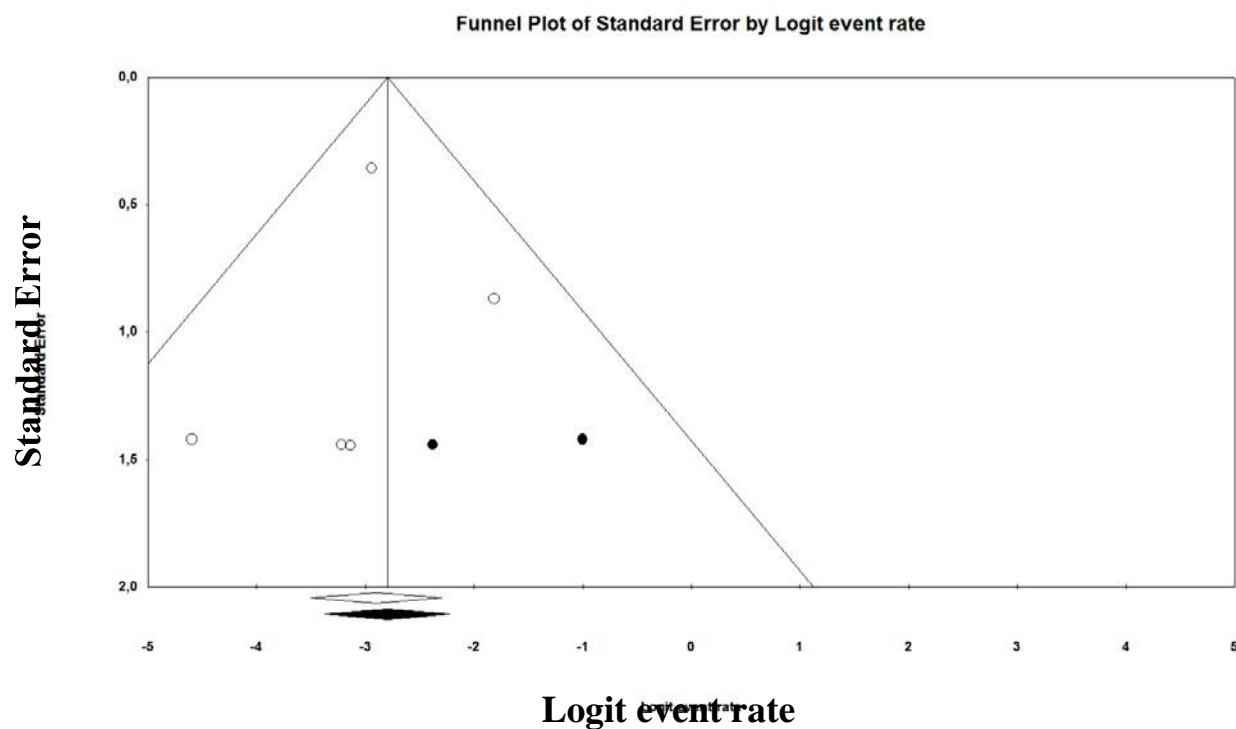

#### Appendix L: Funnel plot of the recorded infection rates for in situ treatment using autogenous veins.

These results are based on the 6 studies included and the 2 additional studies identified by the «Trim and fill» analysis. Egger's test does not show any publication bias ( $p=0.74$ ). The addition of these 2 missing studies tends to provide a higher infection rate: 5.7%; 95% CI: 3.3-9.7.

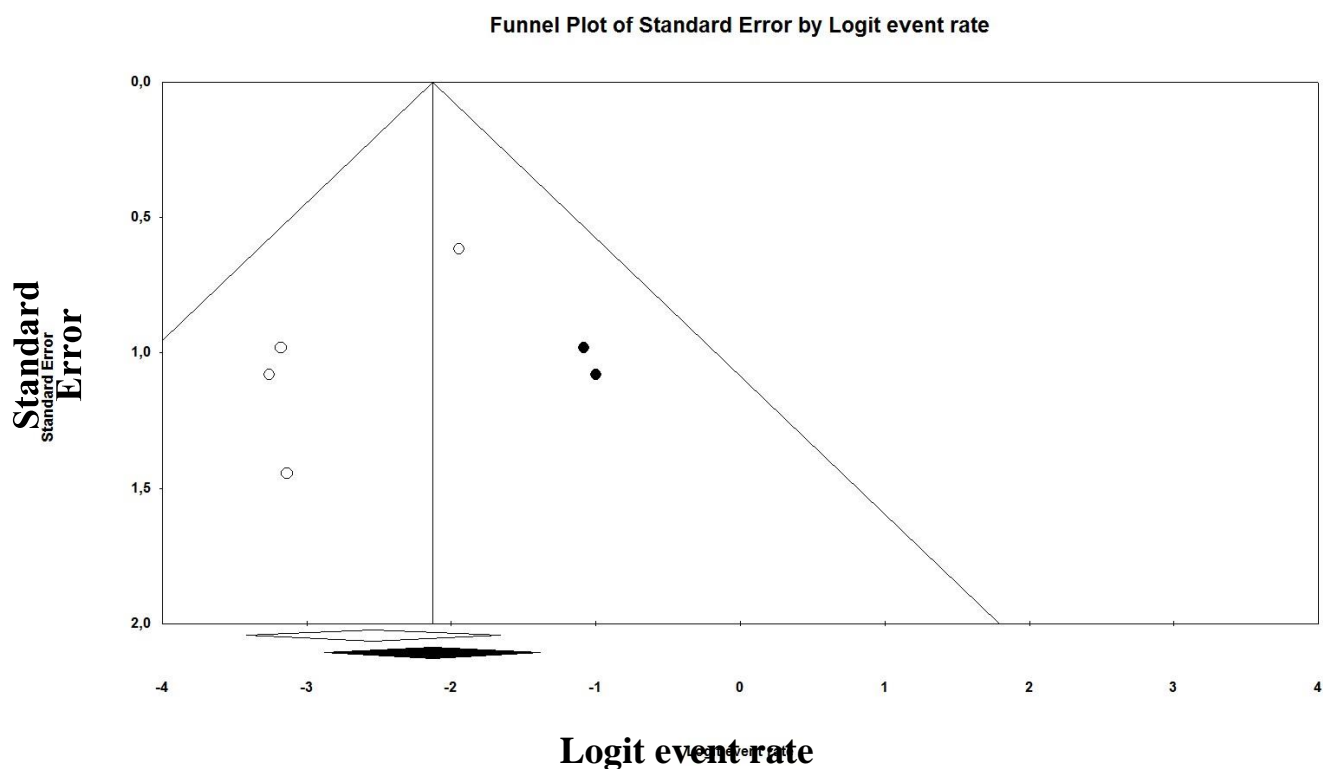

#### **Appendix M: Funnel plot of the recorded infection rates for in situ treatment using Silver-coated polyester.**

These results are based on the 4 studies included and the 2 additional studies identified by the «Trim and fill» analysis. Egger's test does not show any publication bias ( $p=0.111$ ). The addition of these 2 studies tends to show a higher infection rate: 10.6%; 95% CI: 5.3-20.



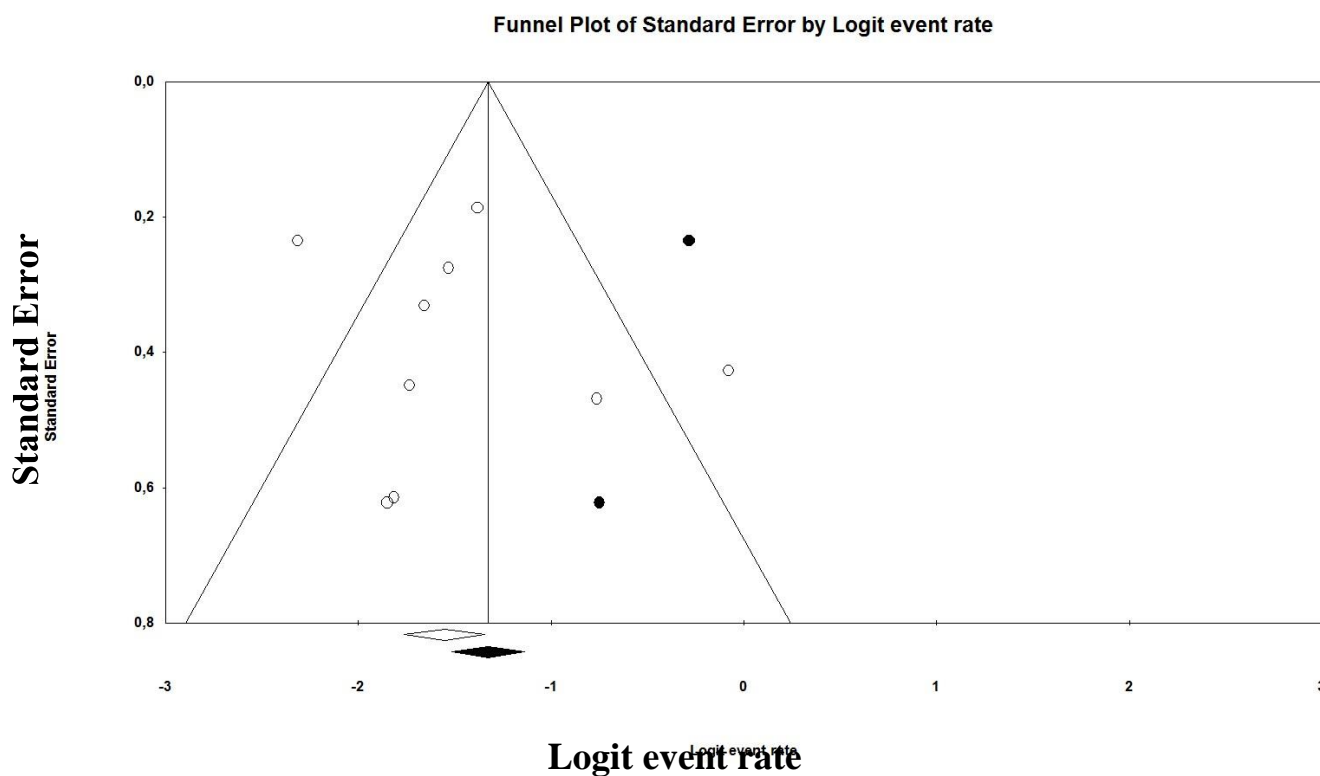

#### Appendix N: Funnel plot of the recorded mortality rates at 30 days for in situ treatment using cryopreserved allograft.

These results are based on the 9 studies included and the 2 additional studies identified by the «Trim and fill» analysis. Egger's test does not show any publication bias ( $p=0.56$ ). The addition of these 2 studies tends to show a higher mortality rate: 21.6%; 95%, CI: 14.8-30.

Funnel Plot of Standard Error by Logit event rate

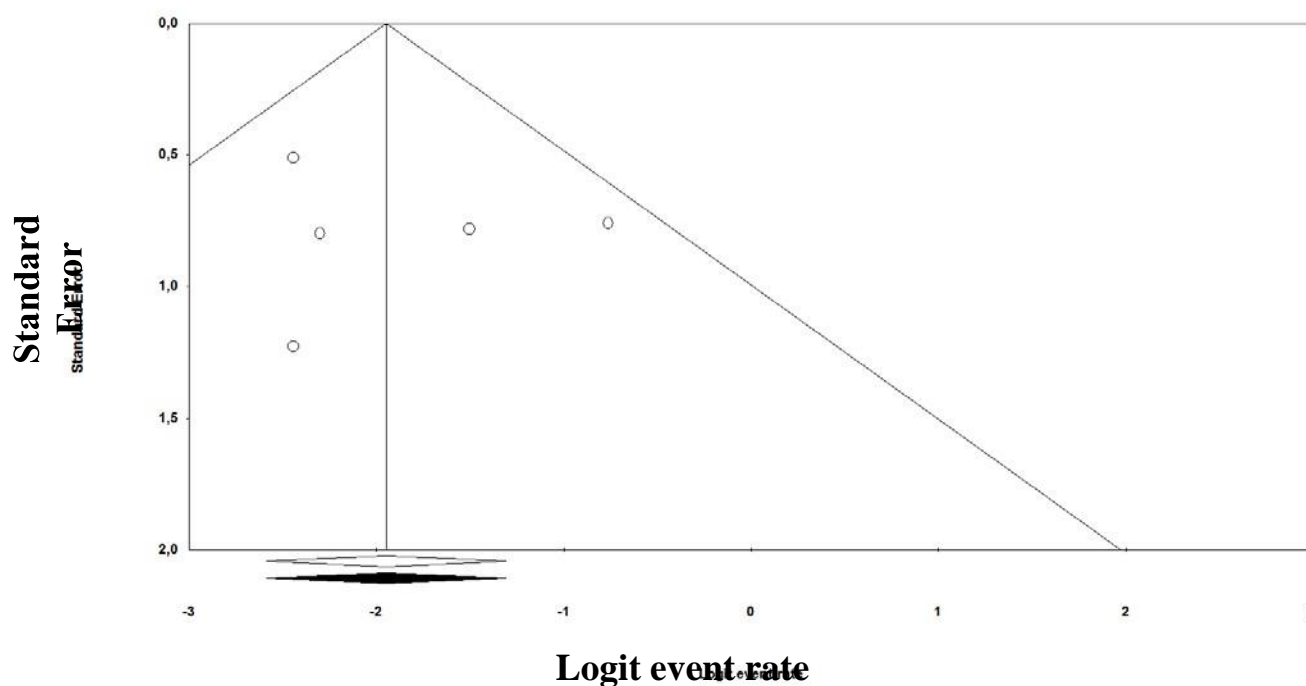

### Appendix O: Funnel plot of the recorded mortality rates at 30 days for in situ treatment using Rifampicinbonded polyester.

These results are based on the 5 studies included. Egger's test does not show any publication bias ( $p=0.67$ ). No missing studies were identified by the «Trim and fill» analysis. The mortality rate at 30 days was 12.5%; 95% CI: 721.3.

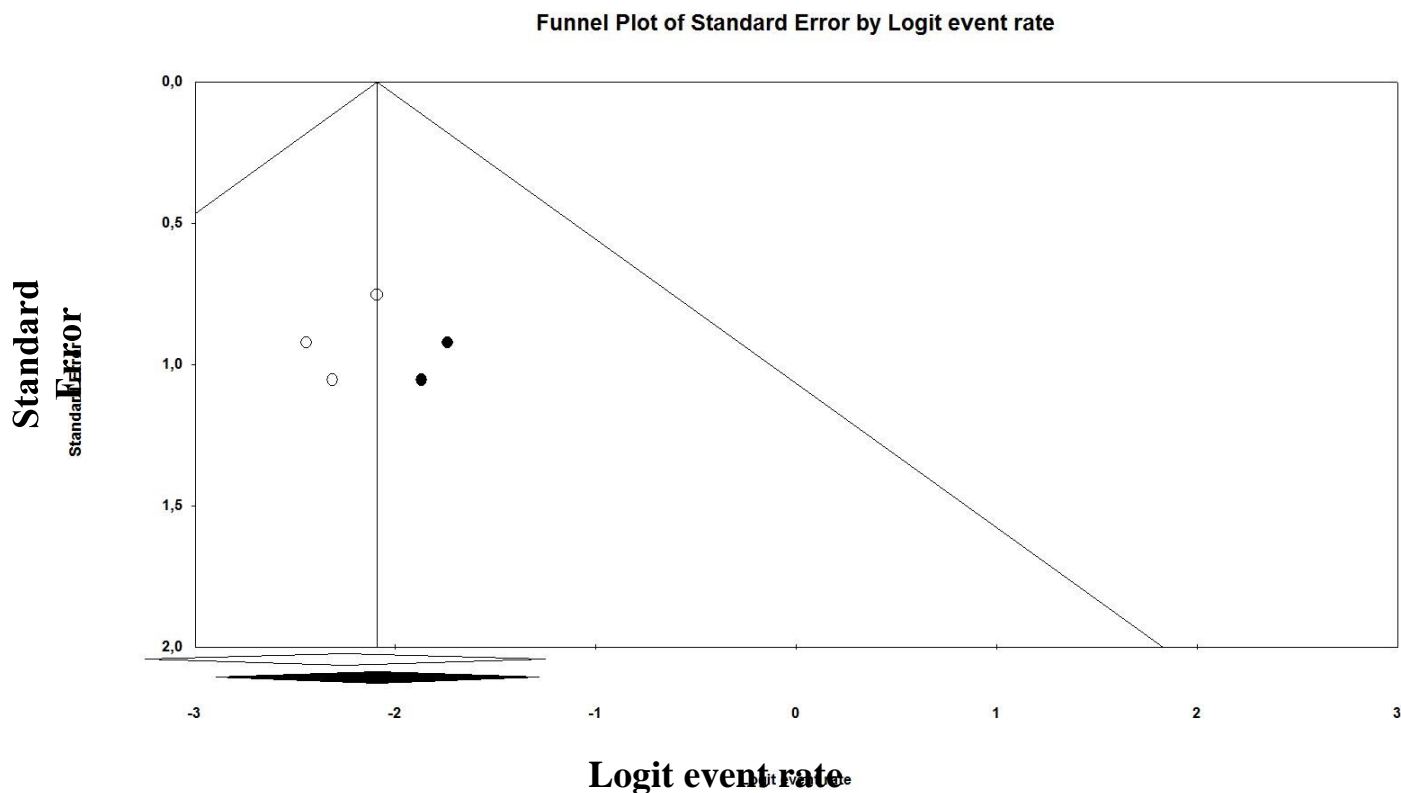

#### **Appendix P: Funnel plot of the recorded mortality rates at 30 days for in situ treatment using standard polyester/PTFE.**

These results are based on the 3 studies included and the 2 additional studies identified by the «Trim and fill» analysis. Egger's test does not show any publication bias ( $p=0.45$ ). The addition of these 2 studies tends to show a higher mortality rate: 11%; 95% CI: 5-21.

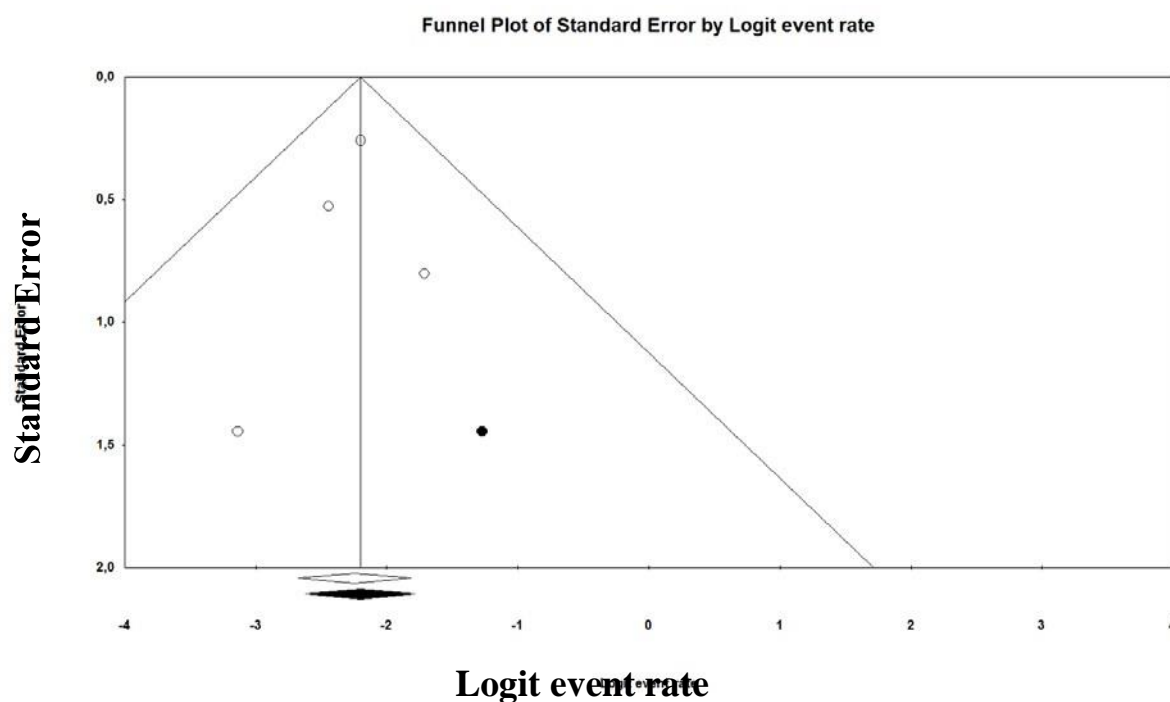

**Appendix Q: : Funnel plot of the recorded mortality rates at 30 days for in situ treatment using autogenous veins.**

These results are based on the 4 studies included and the 2 additional studies identified by the «Trim and fill» analysis. Egger's test does not show any publication bias. The addition of these 2 studies tends to show a higher mortality rate: 9.9%; 95%, CI: 6.7-14.3.

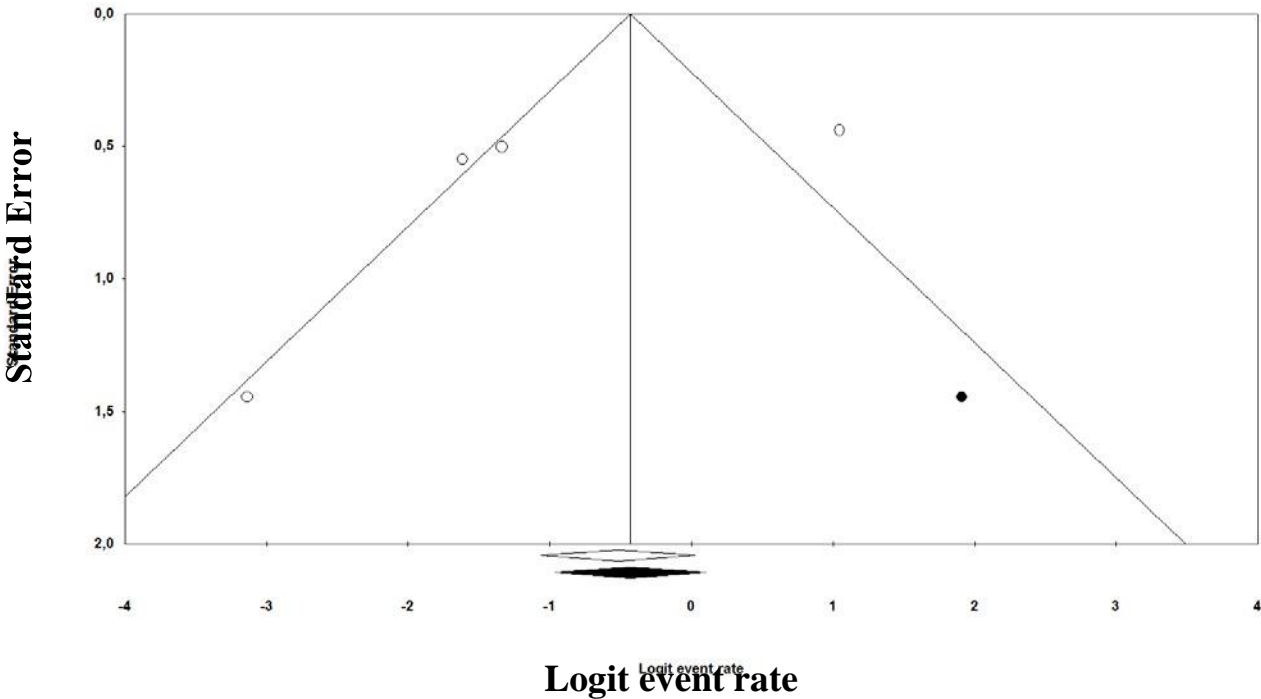

**Appendix R: Funnel plot of the recorded mortality rates at 30 days for in situ treatment using Silver-coated polyester.**

These results are based on the 4 studies included and the additional study identified by the «Trim and fill» analysis. Egger’s test does not show any publication bias. The addition of this study tends to show a higher mortality rate: 16.3%; 95% CI: 10-26%.
